# Supplementary material
Source: publisher site journal article supplement (https://www.dovepress.com/article/210897)
Supplement: Supplementary file 1 [file get_supplementary_file.php]

Appendix I: Dose equivalency medication

| DIN      | category | canister1* | canister2** | DIN      | category | canister1 | canister2 |
|----------|----------|------------|-------------|----------|----------|-----------|-----------|
| 00374407 | ICS      | 0.0010     | -           | 02303671 | ICS      | 0.0031    | -         |
| 00828521 | ICS      | 0.0010     | -           | 02243595 | ICS      | 0.0080    | -         |
| 00828548 | ICS      | 0.0020     | -           | 02243596 | ICS      | 0.0160    | -         |
| 00851752 | ICS      | 0.0050     | -           | 02438690 | ICS      | 0.0040    | -         |
| 00851760 | ICS      | 0.0100     | -           | 02446561 | ICS      | 0.0040    | -         |
| 00852074 | ICS      | 0.0025     | -           | 02446588 | ICS      | 0.0080    | -         |
| 00872334 | ICS      | 0.0010     | -           | 02467895 | ICS      | 0.0220    | -         |
| 00893633 | ICS      | 0.0010     | -           | 02467909 | ICS      | 0.0045    | -         |
| 00897353 | ICS      | 0.0050     | -           | 02467917 | ICS      | 0.0093    | -         |
| 01949993 | ICS      | 0.0010     | -           | 02240835 | ICSLABA  | 0.0040    | 0.0167    |
| 01950002 | ICS      | 0.0020     | -           | 02240836 | ICSLABA  | 0.0100    | 0.0167    |
| 01978918 | ICS      | 0.0125     | -           | 02240837 | ICSLABA  | 0.0200    | 0.0167    |
| 01978926 | ICS      | 0.0250     | -           | 02245126 | ICSLABA  | 0.0050    | 0.0083    |
| 02174731 | ICS      | 0.0010     | -           | 02245127 | ICSLABA  | 0.0100    | 0.0083    |
| 02174758 | ICS      | 0.0020     | -           | 02245385 | ICSLABA  | 0.0025    | 0.0020    |
| 02174766 | ICS      | 0.0050     | -           | 02245386 | ICSLABA  | 0.0050    | 0.0020    |
| 02174774 | ICS      | 0.0100     | -           | 02408872 | ICSLABA  | 0.0040    | 0.0042    |
| 02213583 | ICS      | 0.0010     | -           | 02444186 | ICSLABA  | 0.0080    | 0.0042    |
| 02213591 | ICS      | 0.0020     | -           | 02361744 | ICSLABA  | 0.0020    | 0.0017    |
| 02213605 | ICS      | 0.0050     | -           | 02361752 | ICSLABA  | 0.0040    | 0.0017    |
| 02213613 | ICS      | 0.0100     | -           | 02361760 | ICSLABA  | 0.0080    | 0.0017    |
| 02213710 | ICS      | 0.0010     | -           | 02248218 | ICSLABA  | 0.0100    | 0.0040    |
| 02213729 | ICS      | 0.0020     | -           | 02136139 | LABA     | 0.0083    | -         |
| 02215039 | ICS      | 0.0010     | -           | 02136147 | LABA     | 0.0167    | -         |
| 02215047 | ICS      | 0.0020     | -           | 02211742 | LABA     | 0.0083    | -         |
| 02215055 | ICS      | 0.0050     | -           | 02214261 | LABA     | 0.0167    | -         |
| 02216531 | ICS      | 0.0010     | -           | 02230898 | LABA     | 0.0040    | -         |
| 02229099 | ICS      | 0.0063     | -           | 02231129 | LABA     | 0.0167    | -         |
| 02237244 | ICS      | 0.0020     | -           | 02237224 | LABA     | 0.0040    | -         |
| 02237245 | ICS      | 0.0040     | -           | 02237225 | LABA     | 0.0020    | -         |
| 02237246 | ICS      | 0.0100     | -           | 02376938 | LABA     | 0.0125    | -         |
| 02237247 | ICS      | 0.0200     | -           | 02407868 | LABA     | 0.0008    | -         |
| 02242029 | ICS      | 0.0020     | -           | 02246793 | LAMA     | 0.0333    | -         |
| 02242030 | ICS      | 0.0040     | -           | 02435381 | LAMA     | 0.0006    | -         |
| 02244291 | ICS      | 0.0020     | -           | 02423596 | LAMA     | 0.1157    | -         |
| 02244292 | ICS      | 0.0050     | -           | 02394936 | LAMA     | 0.0926    | -         |
| 02244293 | ICS      | 0.0100     | -           | 02418282 | LAMA     | 0.0926    | -         |
| 02285606 | ICS      | 0.0063     | -           | 02409720 | LAMA     | 0.0333    | -         |
| 02285614 | ICS      | 0.0125     | -           | 02418401 | LAMALABA | 0.1157    | 0.0042    |
| 02441888 | LAMALABA | 0.00463    | 0.00083     | 02261324 | SABA     | 0.0100    | -         |
| 02439530 | LAMALABA | 0.03333    | 0.00400     | 02326450 | SABA     | 0.0050    | -         |
| 00790419 | SABA     | 0.00500    | -           | 00576158 | SAMA     | 0.0050    | -         |
| 00812463 | SABA     | 0.00500    | -           | 00731439 | SAMA     | 0.0625    | -         |
| 00832758 | SABA     | 0.02000    | -           | 00824216 | SAMA     | 0.0050    | -         |
| 00832766 | SABA     | 0.01000    | -           | 01950681 | SAMA     | 0.0625    | -         |
| 00851841 | SABA     | 0.00500    | -           | 02026759 | SAMA     | 0.0313    | -         |

| DIN      | category | canister1 | canister2 | DIN      | category | canister1 | canister2 |
|----------|----------|-----------|-----------|----------|----------|-----------|-----------|
| 00867179 | SABA     | 0.00500   | -         | 02097141 | SAMA     | 0.0625    | -         |
| 00874086 | SABA     | 0.00500   | -         | 02097168 | SAMA     | 0.0625    | -         |
| 01938851 | SABA     | 0.02000   | -         | 02097176 | SAMA     | 0.0313    | -         |
| 01938878 | SABA     | 0.01000   | -         | 02126222 | SAMA     | 0.0625    | -         |
| 02084333 | SABA     | 0.01000   | -         | 02163705 | SAMA     | 0.0053    | -         |
| 02148617 | SABA     | 0.01000   | -         | 02163713 | SAMA     | 0.0105    | -         |
| 02212315 | SABA     | 0.01000   | -         | 02210479 | SAMA     | 0.0063    | -         |
| 02212323 | SABA     | 0.01000   | -         | 02216221 | SAMA     | 0.0625    | -         |
| 02213478 | SABA     | 0.00500   | -         | 02231135 | SAMA     | 0.0313    | -         |
| 02214997 | SABA     | 0.01000   | -         | 02231136 | SAMA     | 0.0625    | -         |
| 02215004 | SABA     | 0.01000   | -         | 02231244 | SAMA     | 0.0625    | -         |
| 02215616 | SABA     | 0.01000   | -         | 02231245 | SAMA     | 0.0625    | -         |
| 02215624 | SABA     | 0.01000   | -         | 02231494 | SAMA     | 0.0625    | -         |
| 02215632 | SABA     | 0.01000   | -         | 02231785 | SAMA     | 0.0625    | -         |
| 02216949 | SABA     | 0.01000   | -         | 02236934 | SAMA     | 0.0313    | -         |
| 02231430 | SABA     | 0.01000   | -         | 02236935 | SAMA     | 0.0625    | -         |
| 02231488 | SABA     | 0.01000   | -         | 02237134 | SAMA     | 0.0625    | -         |
| 02231678 | SABA     | 0.01000   | -         | 02237135 | SAMA     | 0.0625    | -         |
| 02231783 | SABA     | 0.01000   | -         | 02239131 | SAMA     | 0.0625    | -         |
| 02231784 | SABA     | 0.01000   | -         | 02239627 | SAMA     | 0.0053    | -         |
| 02232570 | SABA     | 0.00500   | -         | 02240072 | SAMA     | 0.0053    | -         |
| 02236931 | SABA     | 0.01000   | -         | 02240508 | SAMA     | 0.0053    | -         |
| 02236932 | SABA     | 0.01000   | -         | 02243827 | SAMA     | 0.0313    | -         |
| 02236933 | SABA     | 0.01000   | -         | 02246083 | SAMA     | 0.0053    | -         |
| 02239365 | SABA     | 0.01000   | -         | 02246084 | SAMA     | 0.0105    | -         |
| 02241497 | SABA     | 0.00500   | -         | 02247686 | SAMA     | 0.0050    | -         |
| 02243115 | SABA     | 0.01000   | -         | 02148633 | SAMASABA | 0.0156    | 0.0078    |
| 02243828 | SABA     | 0.01000   | -         | 02163721 | SAMASABA | 0.0050    | 0.0060    |
| 02244914 | SABA     | 0.00500   | -         | 02419106 | SAMASABA | 0.0050    | 0.0050    |
| 02245669 | SABA     | 0.00500   | -         | 02231675 | SAMASABA | 0.0156    | 0.0156    |
| 02259583 | SABA     | 0.01000   | -         |          |          |           |           |

\*coefficient to convert quantity of medications to the reference medication

\*\*coefficient to convert the second component of inhaler in case of combined inhaler

Appendix II: Relative risk of outcome trends

| Outcome           | Relative Risk | Confidence interval |             |
|-------------------|---------------|---------------------|-------------|
|                   |               | Lower Bound         | Upper Bound |
| Canister ICS      | 1.003         | 1.002               | 1.005       |
| Canister LABA     | 1.049         | 1.047               | 1.050       |
| Canister LAMA     | 1.078         | 1.061               | 1.095       |
| Canister SAMA     | 0.937         | 0.934               | 0.939       |
| Canister SABA     | 0.962         | 0.961               | 0.963       |
| LAMA Cost         | 1.130         | 1.126               | 1.133       |
| SAMA Cost         | 0.977         | 0.974               | 0.979       |
| SABA Cost         | 1.009         | 1.007               | 1.011       |
| LABA Cost         | 0.893         | 0.889               | 0.897       |
| ICSLABA Cost      | 1.116         | 1.114               | 1.117       |
| LAMALABA Cost     | 5.602         | 4.443               | 7.062       |
| SAMASABA Cost     | 0.815         | 0.813               | 0.818       |
| ICS Cost          | 0.930         | 0.928               | 0.931       |
| Triple therapy    | 1.132         | 1.129               | 1.136       |
| ICS/LABA Therapy  | 1.076         | 1.074               | 1.077       |
| LAMA/LABA Therapy | 1.041         | 1.030               | 1.052       |
| ICS/LAMA Therapy  | 1.042         | 1.034               | 1.049       |

Appendix III: Factors associated with filling prescriptions for combination therapies under combination therapy with inhaled therapy in COPD patients.

|                                       | <b>ICS/LABA/LAMA</b>       | <b>ICS/LABA</b>            | <b>LAMA/LABA</b>           | <b>ICS/LAMA</b>            |
|---------------------------------------|----------------------------|----------------------------|----------------------------|----------------------------|
| <b>Age (per 10 years)</b>             | 8.48% (7.21, 9.76%)*       | 8.80% (8.14, 9.46%)*       | 19.99% (14.92, 25.29%)*    | 13.80% (10.59, 17.10%)*    |
| <b>Sex ( Female vs male)</b>          | -8.91% (-11.63, -6.12%)*   | 1.54% (0.01, 3.10%)*       | 0.51% (-9.86, 12.08%)      | 9.01% (1.19, 17.44%)*      |
| <b>Rural vs Urban</b>                 | 6.93% (2.64, 11.40%)*      | -0.44% (-2.52, 1.68%)      | 57.73% (37.74, 80.63%)*    | 35.52% (23.44, 48.78%)*    |
| <b>Socio Economic Status **</b>       |                            |                            |                            |                            |
| Quantile 1                            |                            |                            | reference                  |                            |
| Quantile 2                            | 5.43% (0.79, 10.29%)*      | 3.66% (1.33, 6.03%)*       | -11.25% (-24.40, 4.20%)    | -1.89% (-11.73, 9.04%)     |
| Quantile 3                            | 7.54% (2.62, 12.69%)*      | 5.81% (3.36, 8.32%)*       | -0.26% (-15.53, 17.78%)    | 6.02% (-5.38, 18.78%)      |
| Quantile 4                            | 14.84% (9.62, 20.32%)*     | 9.01% (6.47, 11.62%)*      | 6.54% (-9.87, 25.94%)      | 1.56% (-9.42, 13.87%)      |
| Quantile 5                            | 15.05% (9.63, 20.73%)*     | 12.71% (10.01, 15.48%)*    | -0.11% (-16.34, 19.27%)    | 3.32% (-8.60, 16.79%)      |
| Unknown                               | -8.55% (-18.21, 2.27%)     | -5.53% (-10.80, 0.06%)     | -16.09% (-43.70, 25.07%)   | -19.82% (-37.73, 3.25%)    |
| <b>Calendar year</b>                  | 8.44% (8.05, 8.83%)*       | 5.63% (5.46, 5.79%)*       | -0.24% (-1.52, 1.06%)      | 0.07% (-0.80, 0.94%)       |
| <b>Year from COPD Diagnosis</b>       | 9.37% (9.07, 9.68%)*       | 5.56% (5.39, 5.72%)*       | 10.07% (8.90, 11.25%)*     | 9.56% (8.74, 10.39%)*      |
| <b>Death</b>                          | -6.16% (-8.72, -3.54%)*    | -12.01% (-13.30, -10.70%)* | -8.38% (-17.22, 1.41%)     | 2.68% (-4.20, 10.04%)      |
| <b>COPD hospitalization</b>           | 44.46% (41.28, 47.70%)*    | 15.02% (13.74, 16.32%)*    | 42.74% (31.31, 55.16%)*    | 69.61% (60.31, 79.45%)*    |
| <b>COPD related outpatient visits</b> |                            |                            |                            |                            |
| No Outpatient visit                   |                            |                            | reference                  |                            |
| ≥1 GP visit                           | 263.10% (251.71, 274.87%)* | 99.77% (97.03, 102.54%)*   | 196.93% (166.71, 230.58%)* | 198.27% (176.91, 221.29%)* |
| ≥1 Specialist visit                   | 719.91% (690.82, 750.08%)* | 188.67% (183.96, 193.46%)* | 613.01% (529.31, 707.84%)* | 354.77% (316.52, 396.55%)* |
| <b>Charlson comorbidity score</b>     | -3.34% (-3.85, -2.83%)*    | -2.17% (-2.42, -1.91%)*    | -4.84% (-6.64, -3.01%)*    | -3.96% (-5.18, -2.73%)*    |
| <b>History of asthma diagnosis</b>    | 10.98% (8.15, 13.88%)*     | 73.98% (71.96, 76.03%)*    | 2.28% (-6.77, 12.21%)      | 44.20% (36.09, 52.81%)*    |
| <b>Pulmonary function Test</b>        | 44.68% (41.40, 48.04%)*    | 32.36% (30.86, 33.87%)*    | 73.60% (59.42, 89.03%)*    | 54.23% (45.04, 64.01%)*    |
